# Supplementary material for: Development of the Systems Thinking for Health Actions framework: a literature review and a case study
Source: PubMed Central journal article supplement (PMC10030275; doi:10.1136/bmjgh-2022-010191), 2023-03-17
Supplement: bmjgh-2022-010191supp001.pdf [file bmjgh-2022-010191supp001.pdf]

## Search Strategy

### Electronic databases:

1. PubMed
2. Google Scholar

**Search dates:** Search in all databases were conducted in December 2021

**Restrictions on publication period:** The results shown here were restricted to after January 2009.

**Restrictions on language:** Articles published in English

**Types of studies:** No restriction

**Exclusion criteria:** languages other than English and publication date earlier than January 2009

**Inclusion criteria:** Systems thinking tools and methods were used in theory or in practice

The first 50 results in each search were screened. Additionally, 4 papers were added from expert input.

### Search Strategy

#### Database: PubMed

- 
1. **“Systems Thinking” Health Interventions OR “Systems Thinking” Health Initiatives OR “Systems Thinking” Application in Health OR Health “Systems Thinking” Analysis OR Health “Systems Thinking” Approach** Search results: 452
  2. **“Systems Analysis” Health Interventions OR “Systems Analysis” Health Initiatives OR “Systems Analysis” Health Application** Search results: 211
  3. **“Systems Thinking” Lens OR “Systems Thinking” Perspective** Search results: 197
  4. **“Systems Thinking” Tools OR “Systems Thinking” Methods OR “Systems Thinking” Skills**
  5. **OR “Systems Thinking” Policies** Search Results: 402
  6. **“Systems Thinking” Climate Change OR “Systems Thinking” Traffic Safety OR “Systems Thinking” Public Health** Search Results: 625
  7. **(“Systems Thinking” OR “Systems Science” OR “Complexity Science” OR “Complex Systems” OR “System Dynamics” OR “Systems Modelling”) AND “Health”** Search Results: 4,667

#### Database: Google Scholar

1. (“Systems Thinking” Interventions OR “Systems Thinking” Initiatives OR “Systems Thinking” Application OR “Systems Thinking” Analysis OR “Systems Thinking” Approach) AND “Health”) Search Results: 17,000
2. (“Systems Thinking” Lens OR “Systems Thinking” Perspective) AND “Health”) Search Results: 16,900
3. (“Systems Thinking” Tools OR “Systems Thinking” Methods OR “Systems Thinking” Skills OR “Systems Thinking” Policies) AND “Health”) Search Results: 17,500
