# Supplementary material for: Development of the Systems Thinking for Health Actions framework: a literature review and a case study
Source: PubMed Central journal article supplement (PMC10030275; doi:10.1136/bmjgh-2022-010191), 2023-03-17
Supplement: bmjgh-2022-010191supp002.pdf [file bmjgh-2022-010191supp002.pdf]

| Title                                                                                                                                                                         | Country of research                                                                            | ST methods used                                                                                                                                                                                                                                              | Study  | Results                                                                                                                                                                                                        | Key elements                                                                                                                                             | Domain(s) involved |
|-------------------------------------------------------------------------------------------------------------------------------------------------------------------------------|------------------------------------------------------------------------------------------------|--------------------------------------------------------------------------------------------------------------------------------------------------------------------------------------------------------------------------------------------------------------|--------|----------------------------------------------------------------------------------------------------------------------------------------------------------------------------------------------------------------|----------------------------------------------------------------------------------------------------------------------------------------------------------|--------------------|
| <b>Systematic Reviews</b>                                                                                                                                                     |                                                                                                |                                                                                                                                                                                                                                                              |        |                                                                                                                                                                                                                |                                                                                                                                                          |                    |
| The application of systems thinking concepts, methods, and tools to global health practices: An analysis of case studies<br>doi:10.1111/jep.12842<br>(Wilkinson et al., 2018) | United States, United Kingdom, Ghana, Canada, China, Australia, Uganda, Bosnia and Herzegovina | Agent based modelling, social network analysis, scenario planning, systems dynamics modeling (stock and flow diagrams, CLD), innovation/change history, participatory impact pathways analysis, process mapping, stock and flow diagrams, systems archetypes | Review | Common ST methods and tools were largely underutilized. Four themes were identified: the importance of interconnectedness of a system, attributes of leaders in CAS, and the benefits and barriers of using ST | Systematic review of 36 case studies that used ST                                                                                                        | Global health      |
| Thinking about complexity in health: A systematic review of the key systems thinking and complexity ideas in health<br>doi: 10.1111/jep.12856<br>(Rusoja et al., 2018)        | Various                                                                                        | Systems dynamics modeling, CLD, agent-based modeling, social network analysis, concept mapping, scenario technique                                                                                                                                           | Review | ST remains largely a theoretical approach and there is a need for further practical application of it.                                                                                                         | A systematic review that aimed to identify key terms, concepts, and methods in ST literature.                                                            | Healthcare         |
| <b>Reviews</b>                                                                                                                                                                |                                                                                                |                                                                                                                                                                                                                                                              |        |                                                                                                                                                                                                                |                                                                                                                                                          |                    |
| Systems science and oral health: Implications for Dental Public Health?<br>doi:10.1922/CDH_4470Broomhead08<br>(Broomhead, 2019)                                               | Not specified                                                                                  | System dynamics simulations, agent-based models, network analysis, soft-systems analysis, Markov modelling, policy relevant analysis                                                                                                                         | Review | ST offers another dimension to the dental field and can be beneficial in addressing complexity and advancing knowledge of key mechanisms and evolving properties of understanding and promoting dental health. | An overview of how systems science can be used to address complexity problems in the field of dental health and the benefits that ST approaches can have | Dental Health      |

|                                                                                                                                                                                                        |                                 |                                                                                                                                                  |              |                                                                                                                                                                           |                                                                                                                           |                                        |
|--------------------------------------------------------------------------------------------------------------------------------------------------------------------------------------------------------|---------------------------------|--------------------------------------------------------------------------------------------------------------------------------------------------|--------------|---------------------------------------------------------------------------------------------------------------------------------------------------------------------------|---------------------------------------------------------------------------------------------------------------------------|----------------------------------------|
| Applications of systems modelling in obesity research<br>doi: 10.1111/obr.12695<br>(Xue et al., 2018)                                                                                                  | Not specified                   | Agent based modelling and systems dynamics modelling                                                                                             | Review       | Found that there is still a gap between theory and application of systems approaches in public health.                                                                    | Studied the uses of systems modelling and agent-based modelling in obesity research.                                      | Obesity research                       |
| Evaluation of public health interventions from a complex systems perspective: A research methods review<br>doi: 10.1016/j.socscimed.2021.113697<br>(McGill et al., 2021)                               | Not specified                   | CLD, concept mapping, stock and flow diagrams, viable systems model, sociogram, multi-media models, network diagram and spatial patterning image | Review       | Found a wide range of methods used in complex systems and categorized them into mapping, modelling, network analysis and system framing.                                  | Conducted a review of public health interventions to classify and describe methods used in complex public health systems. | Public health                          |
| <b>Individual studies</b>                                                                                                                                                                              |                                 |                                                                                                                                                  |              |                                                                                                                                                                           |                                                                                                                           |                                        |
| A systems approach to assessing complexity in health interventions: an effectiveness decay model for integrated community case management<br>doi:10.1080/16549716.2020.1794106<br>(Karim et al., 2020) | Low and middle income countries | Decision tree modelling, process mapping, CLD, soft systems methodology                                                                          | Intervention | The approach provided insights on many aspects of the program it studied and how its elements interacted with each other, and how it fit within the overall health system | A robust systems approach that proposes the use of system thinking frameworks, concepts and tools                         | Child health                           |
| Advancing the application of systems thinking in health: understanding the dynamics of neonatal mortality in Uganda<br>doi:10.1186/1478-4505-12-36<br>(Rwashana et al., 2014)                          | Uganda                          | CLD and systems dynamics modeling                                                                                                                | Analysis     | The CLDs revealed feedback loops and high leverage points to be seen                                                                                                      | Developed CLDs to display the demand and supply side issues in health services                                            | Neonatal mortality and maternal health |

|                                                                                                                                                                                                                              |           |                             |            |                                                                                                                                                                                                                                                           |                                                                                                                                         |                                      |
|------------------------------------------------------------------------------------------------------------------------------------------------------------------------------------------------------------------------------|-----------|-----------------------------|------------|-----------------------------------------------------------------------------------------------------------------------------------------------------------------------------------------------------------------------------------------------------------|-----------------------------------------------------------------------------------------------------------------------------------------|--------------------------------------|
| Understanding a successful obesity prevention initiative in children under 5 from a systems perspective<br>doi:10.1371/journal.pone.0195141<br>(Owen et al., 2018)                                                           | Australia | CLD                         | Analysis   | The CLD allowed for the complexity of a community based intervention to be represented and understood from feedback loops                                                                                                                                 | Developed a CLD to represent stakeholder perceptions of an intervention                                                                 | Childhood obesity prevention         |
| Advancing the application of systems thinking in health: realist evaluation of the Leadership Development Programme for district manager decision-making in Ghana<br>doi:10.1186/1478-4505-12-29<br>(Prashanth et al., 2014) | Ghana     | CLD and causal tree diagram | Evaluation | The CLD showed that the program did not deviate much from the predicted implementation of the program.                                                                                                                                                    | An evaluation of a leadership program, using a CLD to explain the interactions between contexts, outcomes and mechanisms of the program | Leadership development in Healthcare |
| Advancing the application of systems thinking in health: advice seeking behavior among primary health care physicians in Pakistan<br>doi: 10.1186/1478-4505-12-43<br>(Malik et al., 2014)                                    | Pakistan  | Social network analysis     | Analysis   | The use of the social network analysis showed that doctors did not contact the correct representative when facing a difficult case and the key stakeholder interviews revealed gaps and problems in the system from different stakeholder point of views. | Cross-sectional study that analysed the existing primary health care system and explore how it could be strengthened                    | Primary Healthcare                   |
| Advancing the application of systems thinking in health: understanding the growing complexity governing immunization services in Kerala, India<br>doi: 10.1186/1478-4505-12-47<br>(Varghese et al., 2014)                    | India     | CLD                         | Analysis   | The CLD assisted in the identification and interpretation of the feedback loops that emerged in the analysis. It also helped identify unintended consequences                                                                                             | Explored underlying factors in vaccination coverage and carried out content analysis of the data by looking at                          | Immunization services                |

|                                                                                                                                             |                                          |                 |              |                                                                                                                                                                                                           |                                                                                                                                                       |                                                      |
|---------------------------------------------------------------------------------------------------------------------------------------------|------------------------------------------|-----------------|--------------|-----------------------------------------------------------------------------------------------------------------------------------------------------------------------------------------------------------|-------------------------------------------------------------------------------------------------------------------------------------------------------|------------------------------------------------------|
|                                                                                                                                             |                                          |                 |              | and unexpected phenomena.                                                                                                                                                                                 | features of the complex adaptive systems. With this data, a CLD was created to show the interactions among the key actors and elements of the system. |                                                      |
| Building a systems thinking prevention workforce<br>doi:10.1002/hpja.325<br>(Bensberg et al., 2020)                                         | Australia                                | CLD             | Analysis     | The CLD revealed how cause-effect relationships were drawn from the findings and how they contributed to systems thinking capacity building.                                                              | Conducted semi-structured interviews on participants understanding of the ST, the data from the interviews were used to create a CLD.                 | Workforce systems thinking development in healthcare |
| Using a 'rich picture' to facilitate systems thinking in research coproduction<br>doi:10.1186/s12961-019-0514-2<br>(Conte & Davidson, 2020) | Australia                                | Rich pictures   | Analysis     | The rich picture allowed for the whole system to be seen and for key stakeholders to take part in the inquiry process and to express data in a way that might not be possible through speech and writing. | Used systems thinking principals to examine the dynamics between an IT system and the intervention it was designed to monitor.                        | Research coproduction                                |
| Systems thinking for health emergencies: use of process mapping during outbreak response<br>doi:10.1136/bmjgh-2020-003901                   | Sierra Leone, the Democratic Republic of | Process mapping | Intervention | In all three case studies, the time for reporting the specific disease to the intended audience was                                                                                                       | Used a four-step process mapping methodology for disease outbreaks                                                                                    | Disease outbreaks                                    |

|                                                                                                                                                                                                                                                     |                         |                                                                                                          |              |                                                                                                                                                                                                              |                                                                                                   |                   |
|-----------------------------------------------------------------------------------------------------------------------------------------------------------------------------------------------------------------------------------------------------|-------------------------|----------------------------------------------------------------------------------------------------------|--------------|--------------------------------------------------------------------------------------------------------------------------------------------------------------------------------------------------------------|---------------------------------------------------------------------------------------------------|-------------------|
| (Durski et al., 2020)                                                                                                                                                                                                                               | Congo (DRC) and Nigeria |                                                                                                          |              | drastically lowered after the process mapping exercise was implemented and the time for reporting data was also decreased.                                                                                   | in three different case studies                                                                   |                   |
| Systems approaches to population health in Canada: how have they been applied, and what are the insights and future implications for practice?<br>doi:10.17269/s41997-019-00230-3<br>(Zukowski et al., 2019)                                        | Canada                  | Soft systems methodology, CLD, scenario planning, multi-stakeholder dialogue, systems dynamics modelling | Analysis     | Qualitative methods are effective involving diverse perspectives to develop a complete hypothesis of a system and quantitative models can help determine where the best place in the system is to intervene. | A rapid review of literature to identify case studies of systems thinking in Canada.              | Population health |
| Using systems thinking in state health policymaking: an educational initiative<br>doi: 10.1057/hs.2013.17<br>(Minyard et al., 2014)                                                                                                                 | USA                     | Behavior over time graphs, stock and flow maps, systems dynamics models                                  | Intervention | 93 legislators participated in the course, where the participants were receptive to the systems thinking tools.                                                                                              | A systems thinking certificate program to improve policymaking processes in Georgias legislators. | Policymaking      |
| Advancing the application of systems thinking in health: provider payment and service supply behaviour and incentives in the Ghana National Health Insurance Scheme – a systems approach<br>doi: 10.1186/1478-4505-12-35<br>(Agyepong et al., 2014) | Ghana                   | CLD and causal tree diagrams                                                                             | Analysis     | There is a need for holistic designs and implementations, therefore a systems approach is needed rather than a linear approach.                                                                              | Used mixed methods to evaluate the payment methods in the Ghana health system                     | Health system     |

|                                                                                                                                                                                                                   |                                     |                                                        |              |                                                                                                                                                                                  |                                                                                                                                                                                                                     |                       |
|-------------------------------------------------------------------------------------------------------------------------------------------------------------------------------------------------------------------|-------------------------------------|--------------------------------------------------------|--------------|----------------------------------------------------------------------------------------------------------------------------------------------------------------------------------|---------------------------------------------------------------------------------------------------------------------------------------------------------------------------------------------------------------------|-----------------------|
| A Systems Thinking approach for responding to the COVID-19 pandemic<br>doi: 10.26719/emhj.20.090<br>(Hassan et al., 2020)                                                                                         | South Korea, New Zealand and Jordan | Iceberg tool and biomatrix tool                        | Commentary   | The systems thinking approach is supported through a review of literature and the COVID-19 measures taken in the countries observed.                                             | Applied the Iceberg Tool and Systems Thinking Biomatrix Tool to identify leverage points in the COVID-19 response                                                                                                   | COVID-19              |
| Systems thinking perspectives applied to healthcare transition for youth with disabilities: a paradigm shift for practice, policy and research<br>doi: 10.1111/j.1365-2214.2011.01313.x<br>(Hamdani et al., 2011) | Various                             | Systems dynamics model, CLD and stock and flow diagram | Intervention | The use of systems thinking can assist in determining areas leverage points for interventions and the intended and unintended impacts the interventions will have on the system. | Introduced several systems thinking concepts to healthcare transition for youth with disabilities                                                                                                                   | Health system         |
| Advancing the application of systems thinking in health: exploring dual practice and its management in Kampala, Uganda<br>doi: 10.1186/1478-4505-12-41<br>(Paina et al., 2014)                                    | Uganda                              | CLD                                                    | Analysis     | The CLD illustrated that dual practice occurs due to incentives within the public and private sector.                                                                            | Conducted a document review, qualitative interviews and a qualitative survey to explore the use of dual practice in Uganda. From the data collected, a CLD was created to show the feedback loops in dual practice. | Health care providers |
| Emergency department crowding in Singapore: Insights from a systems thinking approach<br>doi: 10.1177/2050312116671953                                                                                            | Singapore                           | CLD                                                    | Analysis     | The CLD was a great tool to observe the structure of emergency department crowding in Singapore.                                                                                 | Created a CLD after consulting with emergency department                                                                                                                                                            | Emergency care        |

|                                                                                                                                                                                                              |               |                                                                                                                       |            |                                                                                                                                                                                |                                                                                                     |                             |
|--------------------------------------------------------------------------------------------------------------------------------------------------------------------------------------------------------------|---------------|-----------------------------------------------------------------------------------------------------------------------|------------|--------------------------------------------------------------------------------------------------------------------------------------------------------------------------------|-----------------------------------------------------------------------------------------------------|-----------------------------|
| (Schoenenberger et al., 2016)                                                                                                                                                                                |               |                                                                                                                       |            |                                                                                                                                                                                | experts, a literature review and direct observation.                                                |                             |
| Understanding the dynamics of obesity prevention policy decision-making using a systems perspective: A case study of Healthy Together Victoria<br>doi: 10.1371/journal.pone.0245535<br>(Clarke et al., 2021) | Australia     | CLD                                                                                                                   | Analysis   | The CLD revealed recurrent associations and feedback mechanisms between the components of the policy systems.                                                                  | Created a CLD from interviews and a document analysis from the Healthy Together Victoria Initiative | Obesity prevention policies |
| Using systems science to understand the determinants of inequities in healthy eating<br>doi: 10.1371/journal.pone.0188872<br>(Friel et al., 2017)                                                            | Australia     | CLD, agent-based models, network analysis and soft systems methodology                                                | Analysis   | The final CLD made it possible to organize and analyze complex information with a holistic system perspective.                                                                 | Used a group of policy experts to build a systems model and mind maps to create a final CLD.        | Healthy eating              |
| Rethinking health systems strengthening: key systems thinking tools and strategies for transformational change<br>doi: 10.1093/heapol/czs090<br>(Swanson et al., 2012)                                       | Not specified | Concept mapping, social network analysis, agent-based modelling, system dynamics modelling, systemic policy analysis  | Commentary | Suggests three overarching themes of using ST tools: collaboration across disciplines, sectors and organizations; ongoing, iterative learning; and transformational leadership | Argues that key ST tools and strategies have the possibility to transform health systems.           | Health systems              |
| Systems Thinking as a Framework for Analyzing Commercial Determinants of Health<br>doi: 10.1111/1468-0009.12339<br>(Knai et al., 2018)                                                                       | Not specified | CLD, conceptual modeling, stakeholder analysis, document analysis, media analysis, group model building, logic models | Analysis   | Found that applying a systems perspective was beneficial and can be used in other complex public health issues.                                                                | Examined how a systems perspective can be useful to analyzing the commercial                        | Determinants of health      |

|                                                                                                                                                                                                   |          |                                                       |                            |                                                                                                                            |                                                                                                                                                               |                  |
|---------------------------------------------------------------------------------------------------------------------------------------------------------------------------------------------------|----------|-------------------------------------------------------|----------------------------|----------------------------------------------------------------------------------------------------------------------------|---------------------------------------------------------------------------------------------------------------------------------------------------------------|------------------|
|                                                                                                                                                                                                   |          |                                                       |                            |                                                                                                                            | determinants of noncommunicable diseases.                                                                                                                     |                  |
| Application of systems thinking: 12-month postintervention evaluation of a complex health system intervention in Zambia: the case of the BHOMA<br>doi: 10.1111/jep.12354<br>(Mutale et al., 2017) | Zambia   | Systems-thinking guided analysis framework and CLD    | Intervention               | The ST approach used assisted in evaluating the complex intervention.                                                      | Conducted a qualitative study and used a systems thinking conceptual framework to analyze the intentional and unintentional consequences of the intervention. | Health system    |
| Using Behavior Over Time Graphs to Spur Systems Thinking Among Public Health Practitioners<br>doi:10.5888/pcd15.170254<br>(Calancie et al., 2018)                                                 | USA      | Behavior over time graphs and group model building    | Intervention               | Most practitioners involved in the learning of behavior over time graphs found it a useful tool for engaging stakeholders. | Suggests the use of behavior over time graphs to describe a variety of public health issues to public health practitioners                                    | Public health    |
| Understanding the Problem of Access to Public Health Insurance Schemes among Cross-Border Migrants in Thailand through Systems Thinking<br>doi:10.3390/ijerph17145113<br>(Kunpeuk et al., 2020)   | Thailand | Dynamic simulation model, CLD, stock and flow diagram | Application /Intervention? | The CLD and stock and flow diagram helped identify the dynamics of migrants accessing health insurance in Thailand.        | Applied ST to explore the factors limiting public health insurance access to migrants in Thailand.                                                            | Health insurance |
| Moving towards culturally competent health systems for migrants? Applying systems thinking in a                                                                                                   | Malaysia | CLD                                                   | Analysis                   | The CLDs helped identify four major themes affecting micro-level interactions in the health system.                        | Conducted key stakeholder interviews and a                                                                                                                    | Health system    |



|                                                                                                                                                                                                                                              |     |                                                     |                       |                                                                                                                                                   |                                                                                                       |                                        |
|----------------------------------------------------------------------------------------------------------------------------------------------------------------------------------------------------------------------------------------------|-----|-----------------------------------------------------|-----------------------|---------------------------------------------------------------------------------------------------------------------------------------------------|-------------------------------------------------------------------------------------------------------|----------------------------------------|
| qualitative study in Malaysia and Thailand<br>doi: 10.1371/journal.pone.0231154<br>(Pocock et al., 2020)                                                                                                                                     |     |                                                     |                       |                                                                                                                                                   | document review to create CLDs .                                                                      |                                        |
| Applications of Systems Science to Understand and Manage Multiple Influences within Children's Environmental Health in Least Developed Countries: A Causal Loop Diagram Approach<br>doi: 10.3390/ijerph18063010<br>(Brereton & Jagals, 2021) | LDC | CLD                                                 | Analysis              | The CLD helped identify important feedback loops between different variables that effect children's environmental health.                         | A literature review was conducted to determine variables for a CLD.                                   | Children's environmental health        |
| Capturing complexity in work disability research: application of system dynamics modeling methodology<br>doi: 10.3109/09638288.2015.1031291<br>(Jetha et al., 2016)                                                                          | USA | Systems dynamics modeling                           | Application           | The system dynamics model captured the complexity of work disability and shows a visual of the dynamic relationships that effect work disability. | Applied a systems thinking lens to work disability and created a system dynamics model.               | Work disability research               |
| Systems Thinking Tools as Applied to Community-Based Participatory Research: A Case Study<br>doi: 10.1177/1090198111430708<br>(BeLue et al., 2012)                                                                                           | USA | CLD, behavior over time graphs, and concept mapping | Intervention Planning | The use of the tools may help understand the dynamics of a community and may help with sustainability and effectiveness of interventions.         | Used case studies to demonstrate the use of systems thinking tools.                                   | Community-based participatory research |
| Systems thinking and complexity: considerations for health promoting schools<br>doi: 10.1093/heapro/dav109<br>(Rosas, 2017)                                                                                                                  | USA | Network analysis, group model building, and CLD     | Analysis              | Using ST can assist in addressing the challenges in promoting health in schools.                                                                  | Used ST to determine challenges in promoting health in schools through the exploration of four system | School health                          |

|                                                                                                                                          |           |                                                                                                         |              |                                                                                                                             |                                                                                                                                                                                  |                             |
|------------------------------------------------------------------------------------------------------------------------------------------|-----------|---------------------------------------------------------------------------------------------------------|--------------|-----------------------------------------------------------------------------------------------------------------------------|----------------------------------------------------------------------------------------------------------------------------------------------------------------------------------|-----------------------------|
|                                                                                                                                          |           |                                                                                                         |              |                                                                                                                             | thinking areas:<br>knowledge,<br>networks, models<br>and organizing.                                                                                                             |                             |
| Translating systems thinking into practice for community action on childhood obesity<br>doi:10.1111/obr.12865<br>(Allender et al., 2019) | Australia | CLD                                                                                                     | Intervention | The creation of CLDs allowed the community to visualize the community's systems and see where they feel action is possible. | Used a system lens to describe a obesity intervention, specifically the Fister-Fishman's systems framework.                                                                      | Childhood obesity           |
| A Systems Thinking Methodology for Studying Prevention Efforts in Communities<br>doi:10.1007/s11213-020-09544-7<br>(Riley et al., 2021)  | Australia | Social network analysis, system map, community workshop, group model building, CLD and system inventory | Intervention | Allowed for a wide range of ST methods to be applied, while allowing adaption for the specific contexts.                    | Created a methodology that combined ST tools and systematic inquiry processes. It included four domains of inquiry. ST tools were applied to investigate each domain of inquiry. | Public health               |
| Complex systems thinking and current impasses in health disparities research<br>doi: 10.2105/AJPH.2011.300149<br>(Diez Roux, 2011)       | USA       | Concept mapping, agent-based models, and system dynamics models                                         |              | ST can help health disparities research move beyond current impasses that are in place.                                     | Provided illustrative examples of how ST tools can help to address unanswered questions in various examples.                                                                     | Health disparities research |
| Systems Thinking in the Context of Road Safety: Can Systems Tools Help                                                                   | USA       | System map, CLD and 5 r's framework                                                                     |              | ST tools can help to implement the Safe Systems                                                                             | Suggests a Safe Systems approach                                                                                                                                                 | Road traffic safety         |

|                                                                                                                                                            |               |                       |          |                                                                                                                                                                                                             |                                                           |               |
|------------------------------------------------------------------------------------------------------------------------------------------------------------|---------------|-----------------------|----------|-------------------------------------------------------------------------------------------------------------------------------------------------------------------------------------------------------------|-----------------------------------------------------------|---------------|
| us Realize a True "Safe Systems" Approach?<br>(Naumann et al., 2020)                                                                                       |               |                       |          | concepts holistically. ST tools help produce a unified and cohesive view of the problem the multi-component factors and interactions of the underlying problem and the larger system we are working within. | for road safety practice using ST tools.                  |               |
| Agent-Based Modeling in Public Health: Current Applications and Future Directions<br>doi: 10.1146/annurev-publhealth-040617-014317<br>(Tracy et al., 2018) | Not specified | Agent-based modelling | Analysis | Using agent-based models in public health can improve model validation, and better inform research practice and policy.                                                                                     | Explored how agent-based models can improve public health | Public Health |
